# Supplementary material
Source: Springer Nature journal article supplement (https://www.springermedizin.de/resource/supplementary/13063_2012_1035_MOESM3_ESM.pdf/9619370)
Supplement: MOESM3 [file 9619370]

# Scenario 338

Accrual to comparison

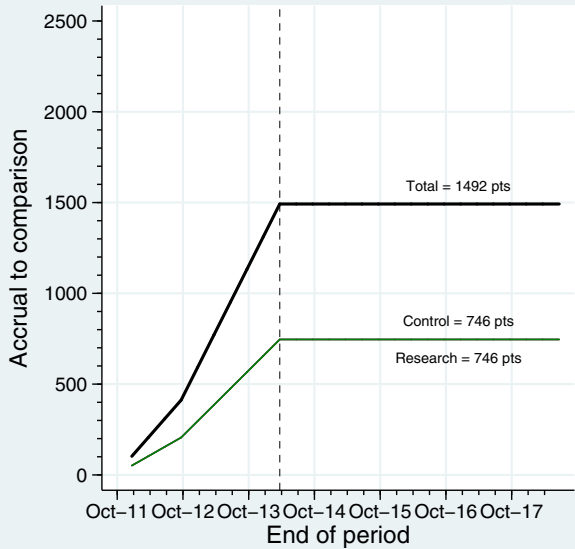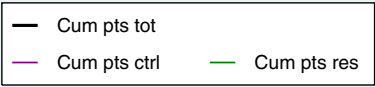

Control arm events

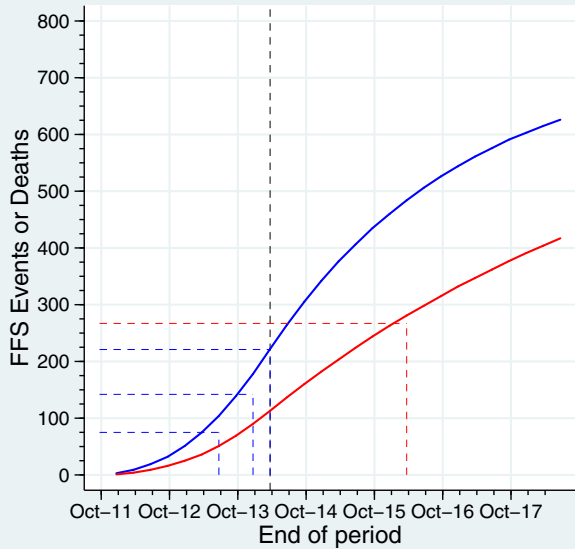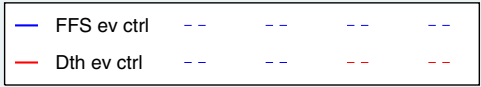

Monthly accrual = 60 for 10 quarters (30m) --> 1492 pts (746 control, 746 research)  
 Accrual pattern = Existing arms overlaps for 4 quarters. No new arms added  
 Allocation ratio = 2:2  
 Matures after 18 quarters (54m)
